# Supplementary material
Source: PubMed Central journal article supplement (PMC6354673)
Supplement: wxy003_suppl_supplementary-material.pdf [file wxy003_suppl_supplementary-material.pdf]

## **Online Supplementary Material**

### **Characterization of the selective recording of workplace exposure measurements into OSHA's IMIS databank**

**Philippe Sarazin (1,6), Igor Burstyn (2), Laurel Kincl (3), Melissa C. Friesen (4), Jérôme Lavoué (5,6)**

(1) Institut de recherche Robert-Sauvé en santé et en sécurité du travail, Chemical and Biological Hazards Prevention, Montréal, Québec, Canada

(2) Drexel University, Environmental and Occupational Health, Philadelphia, Pennsylvania, United States

(3) Oregon State University, College of Public Health and Human Sciences, Corvallis, Oregon, United States

(4) National Cancer Institute, Division of Cancer Epidemiology & Genetics, Occupational and Environmental Epidemiology, Rockville, Maryland, United States

(5) University of Montreal Hospital Research Centre, Montréal, Québec, Canada

(6) Université de Montréal, Department of Occupational and Environmental Health, Montréal, Québec, Canada

Table S1: List and short description of OSH Standards codes used to create the variables associated with the violative behavior of a given establishment

| std_code | Part Number | Part Title    | Subpart | Subpart Title                  | Title                                             |
|----------|-------------|---------------|---------|--------------------------------|---------------------------------------------------|
| 19100134 | 1910        | OSH Standards | I       | Personal Protective Equipment  | Respiratory Protection.                           |
| 19101000 | 1910        | OSH Standards | Z       | Toxic and Hazardous Substances | Air contaminants.                                 |
| 19101001 | 1910        | OSH Standards | Z       | Toxic and Hazardous Substances | Asbestos.                                         |
| 19101002 | 1910        | OSH Standards | Z       | Toxic and Hazardous Substances | Coal tar pitch volatiles; interpretation of term. |
| 19101003 | 1910        | OSH Standards | Z       | Toxic and Hazardous Substances | 13 Carcinogens (4-Nitrobiphenyl, etc.).           |
| 19101004 | 1910        | OSH Standards | Z       | Toxic and Hazardous Substances | alpha-Naphthylamine.                              |
| 19101006 | 1910        | OSH Standards | Z       | Toxic and Hazardous Substances | Methyl chloromethyl ether.                        |
| 19101007 | 1910        | OSH Standards | Z       | Toxic and Hazardous Substances | 3,4-Dichlorobenzidine (and its salts).            |
| 19101008 | 1910        | OSH Standards | Z       | Toxic and Hazardous Substances | bis-Chloromethyl ether.                           |
| 19101009 | 1910        | OSH Standards | Z       | Toxic and Hazardous Substances | beta-Naphthylamine.                               |
| 19101010 | 1910        | OSH Standards | Z       | Toxic and Hazardous Substances | Benzidine.                                        |
| 19101011 | 1910        | OSH Standards | Z       | Toxic and Hazardous Substances | 4-Aminodiphenyl.                                  |
| 19101012 | 1910        | OSH Standards | Z       | Toxic and Hazardous Substances | Ethyleneimine.                                    |
| 19101013 | 1910        | OSH Standards | Z       | Toxic and Hazardous Substances | beta-Propiolactone.                               |
| 19101014 | 1910        | OSH Standards | Z       | Toxic and Hazardous Substances | 2-Acetylaminofluorene.                            |
| 19101015 | 1910        | OSH Standards | Z       | Toxic and Hazardous Substances | 4-Dimethylaminoazobenzene.                        |
| 19101016 | 1910        | OSH Standards | Z       | Toxic and Hazardous Substances | N-Nitrosodimethylamine.                           |
| 19101017 | 1910        | OSH Standards | Z       | Toxic and Hazardous Substances | Vinyl chloride.                                   |
| 19101018 | 1910        | OSH Standards | Z       | Toxic and Hazardous Substances | Inorganic arsenic.                                |
| 19101020 | 1910        | OSH Standards | Z       | Toxic and Hazardous Substances | Access to employee exposure and medical records.  |
| 19101025 | 1910        | OSH Standards | Z       | Toxic and Hazardous Substances | Lead.                                             |
| 19101027 | 1910        | OSH Standards | Z       | Toxic and Hazardous Substances | Cadmium                                           |
| 19101028 | 1910        | OSH Standards | Z       | Toxic and Hazardous Substances | Benzene.                                          |
| 19101029 | 1910        | OSH Standards | Z       | Toxic and Hazardous Substances | Coke oven emissions.                              |
| 19101030 | 1910        | OSH Standards | Z       | Toxic and Hazardous Substances | Bloodborne pathogens.                             |
| 19101043 | 1910        | OSH Standards | Z       | Toxic and Hazardous Substances | Cotton dust.                                      |
| 19101044 | 1910        | OSH Standards | Z       | Toxic and Hazardous Substances | 1,2-dibromo-3-chloropropane.                      |
| 19101045 | 1910        | OSH Standards | Z       | Toxic and Hazardous Substances | Acrylonitrile.                                    |
| 19101047 | 1910        | OSH Standards | Z       | Toxic and Hazardous Substances | Ethylene oxide.                                   |
| 19101048 | 1910        | OSH Standards | Z       | Toxic and Hazardous Substances | Formaldehyde.                                     |
| 19101050 | 1910        | OSH Standards | Z       | Toxic and Hazardous Substances | Methylenedianiline                                |
| 19101052 | 1910        | OSH Standards | Z       | Toxic and Hazardous Substances | Methylene Chloride.                               |
| 19101200 | 1910        | OSH Standards | Z       | Toxic and Hazardous Substances | Hazard Communication.                             |

Characterization of the selective recording of workplace exposure measurements into OSHA's IMIS databank. Philippe Sarazin, Igor Burstyn, Laurel Kincl, Melissa C. Friesen, Jérôme Lavoué

| std_code | Part Number | Part Title                                                 | Subpart | Subpart Title                  | Title                                   |
|----------|-------------|------------------------------------------------------------|---------|--------------------------------|-----------------------------------------|
| 19151000 | 1915        | Occup. Safety and Health Standards for Shipyard Employment | Z       | Toxic and Hazardous Substances | Air contaminants                        |
| 19151001 | 1915        | Occup. Safety and Health Standards for Shipyard Employment | Z       | Toxic and Hazardous Substances | Asbestos                                |
| 19151003 | 1915        | Occup. Safety and Health Standards for Shipyard Employment | Z       | Toxic and Hazardous Substances | 13 Carcinogens (4-Nitrobiphenyl, etc.). |
| 19151004 | 1915        | Occup. Safety and Health Standards for Shipyard Employment | Z       | Toxic and Hazardous Substances | alpha-Naphthylamine.                    |
| 19151006 | 1915        | Occup. Safety and Health Standards for Shipyard Employment | Z       | Toxic and Hazardous Substances | Methyl chloromethyl ether.              |
| 19151007 | 1915        | Occup. Safety and Health Standards for Shipyard Employment | Z       | Toxic and Hazardous Substances | 3,-Dichlorobenzidine (and its salts).   |
| 19151008 | 1915        | Occup. Safety and Health Standards for Shipyard Employment | Z       | Toxic and Hazardous Substances | bis-Chloromethyl ether.                 |
| 19151009 | 1915        | Occup. Safety and Health Standards for Shipyard Employment | Z       | Toxic and Hazardous Substances | beta-Naphthylamine.                     |
| 19151010 | 1915        | Occup. Safety and Health Standards for Shipyard Employment | Z       | Toxic and Hazardous Substances | Benzidine.                              |
| 19151011 | 1915        | Occup. Safety and Health Standards for Shipyard Employment | Z       | Toxic and Hazardous Substances | 4-Aminodiphenyl.                        |
| 19151012 | 1915        | Occup. Safety and Health Standards for Shipyard Employment | Z       | Toxic and Hazardous Substances | Ethyleneimine.                          |
| 19151013 | 1915        | Occup. Safety and Health Standards for Shipyard Employment | Z       | Toxic and Hazardous Substances | beta-Propiolactone.                     |
| 19151014 | 1915        | Occup. Safety and Health Standards for Shipyard Employment | Z       | Toxic and Hazardous Substances | 2-Acetylaminofluorene.                  |
| 19151015 | 1915        | Occup. Safety and Health Standards for Shipyard Employment | Z       | Toxic and Hazardous Substances | 4-Dimethylaminoazobenzene.              |
| 19151016 | 1915        | Occup. Safety and Health Standards for Shipyard Employment | Z       | Toxic and Hazardous Substances | N-Nitrosodimethylamine.                 |
| 19151017 | 1915        | Occup. Safety and Health Standards for Shipyard Employment | Z       | Toxic and Hazardous Substances | Vinyl chloride.                         |
| 19151018 | 1915        | Occup. Safety and Health Standards for Shipyard Employment | Z       | Toxic and Hazardous Substances | Inorganic arsenic.                      |
| 19151025 | 1915        | Occup. Safety and Health Standards for Shipyard Employment | Z       | Toxic and Hazardous Substances | Lead.                                   |
| 19151027 | 1915        | Occup. Safety and Health Standards for Shipyard Employment | Z       | Toxic and Hazardous Substances | Cadmium                                 |
| 19151028 | 1915        | Occup. Safety and Health Standards for Shipyard Employment | Z       | Toxic and Hazardous Substances | Benzene.                                |
| 19151030 | 1915        | Occup. Safety and Health Standards for Shipyard Employment | Z       | Toxic and Hazardous Substances | Bloodborne pathogens.                   |
| 19151044 | 1915        | Occup. Safety and Health Standards for Shipyard Employment | Z       | Toxic and Hazardous Substances | 1,2-dibromo-3-chloropropane.            |
| 19151045 | 1915        | Occup. Safety and Health Standards for Shipyard Employment | Z       | Toxic and Hazardous Substances | Acrylonitrile.                          |
| 19151047 | 1915        | Occup. Safety and Health Standards for Shipyard Employment | Z       | Toxic and Hazardous Substances | Ethylene oxide.                         |
| 19151048 | 1915        | Occup. Safety and Health Standards for Shipyard Employment | Z       | Toxic and Hazardous Substances | Formaldehyde.                           |
| 19261101 | 1926        | Safety and Health Regulations for Construction             | Z       | Toxic and Hazardous Substances | Asbestos                                |
| 19261103 | 1926        | Safety and Health Regulations for Construction             |         | Toxic and Hazardous Substances |                                         |
| 19261104 | 1926        | Safety and Health Regulations for Construction             |         | Toxic and Hazardous Substances |                                         |
| 19261106 | 1926        | Safety and Health Regulations for Construction             |         | Toxic and Hazardous Substances |                                         |
| 19261107 | 1926        | Safety and Health Regulations for Construction             |         | Toxic and Hazardous Substances |                                         |
| 19261108 | 1926        | Safety and Health Regulations for Construction             |         | Toxic and Hazardous Substances |                                         |
| 19261109 | 1926        | Safety and Health Regulations for Construction             |         | Toxic and Hazardous Substances |                                         |
| 19261110 | 1926        | Safety and Health Regulations for Construction             |         | Toxic and Hazardous Substances |                                         |
| 19261111 | 1926        | Safety and Health Regulations for Construction             |         | Toxic and Hazardous Substances |                                         |

Characterization of the selective recording of workplace exposure measurements into OSHA's IMIS databank. Philippe Sarazin, Igor Burstyn, Laurel Kincl, Melissa C. Friesen, Jérôme Lavoué

| std_code | Part Number | Part Title                                     | Subpart | Subpart Title                  | Title |
|----------|-------------|------------------------------------------------|---------|--------------------------------|-------|
| 19261112 | 1926        | Safety and Health Regulations for Construction |         | Toxic and Hazardous Substances |       |
| 19261113 | 1926        | Safety and Health Regulations for Construction |         | Toxic and Hazardous Substances |       |
| 19261114 | 1926        | Safety and Health Regulations for Construction |         | Toxic and Hazardous Substances |       |
| 19261115 | 1926        | Safety and Health Regulations for Construction |         | Toxic and Hazardous Substances |       |
| 19261116 | 1926        | Safety and Health Regulations for Construction |         | Toxic and Hazardous Substances |       |
| 19261117 | 1926        | Safety and Health Regulations for Construction |         | Toxic and Hazardous Substances |       |
| 19261118 | 1926        | Safety and Health Regulations for Construction |         | Toxic and Hazardous Substances |       |
| 19261127 | 1926        | Safety and Health Regulations for Construction |         | Toxic and Hazardous Substances |       |
| 19261128 | 1926        | Safety and Health Regulations for Construction |         | Toxic and Hazardous Substances |       |
| 19261129 | 1926        | Safety and Health Regulations for Construction |         | Toxic and Hazardous Substances |       |
| 19261144 | 1926        | Safety and Health Regulations for Construction |         | Toxic and Hazardous Substances |       |
| 19261145 | 1926        | Safety and Health Regulations for Construction |         | Toxic and Hazardous Substances |       |
| 19261147 | 1926        | Safety and Health Regulations for Construction |         | Toxic and Hazardous Substances |       |
| 19261148 | 1926        | Safety and Health Regulations for Construction |         | Toxic and Hazardous Substances |       |

Table S2: Proportion of CEHD sampling results recorded into IMIS for all variables

| Variable/<br>category                         | Proportion of sampling<br>results recorded into<br>IMIS (%) |
|-----------------------------------------------|-------------------------------------------------------------|
| (Panel) X (Exposure level)                    |                                                             |
| Panel_no : Not detected                       | 29                                                          |
| Panel_no : Detected < PEL                     | 54                                                          |
| Panel_no : Detected ≥ PEL                     | 64                                                          |
| Panel_yes : Not detected                      | 28                                                          |
| Panel_yes : Detected < PEL                    | 49                                                          |
| Panel_yes : Detected ≥ PEL                    | 57                                                          |
| Sampling time                                 |                                                             |
| 480 minutes vs. 30 minutes                    |                                                             |
| PEL citations in inspection                   |                                                             |
| None (0)                                      | 38                                                          |
| Low (1-4)                                     | 38                                                          |
| High (5+)                                     | 37                                                          |
| RespProt & HazComm citations<br>in inspection |                                                             |
| None (0)                                      | 37                                                          |
| Low (1-3)                                     | 38                                                          |
| High (4+)                                     | 40                                                          |
| Other citations in inspection                 |                                                             |
| None (0)                                      | 36                                                          |
| Low (1-5)                                     | 39                                                          |
| High (6+)                                     | 39                                                          |
| Other detected levels in<br>inspection        |                                                             |
| None (0%)                                     | 35                                                          |
| Low (1-33%)                                   | 34                                                          |
| Med (34-66%)                                  | 40                                                          |
| High (67%+)                                   | 49                                                          |
| Establishment size                            |                                                             |
| Small (1-35)                                  | 40                                                          |
| Medium (36-150)                               | 39                                                          |
| Large (151+)                                  | 36                                                          |
| Penalty                                       |                                                             |
| None                                          | 37                                                          |
| Low                                           | 40                                                          |
| Medium                                        | 39                                                          |
| High                                          | 36                                                          |
| OSHA region <sup>a</sup>                      |                                                             |
| Boston                                        | 41                                                          |
| New York                                      | 28                                                          |
| Philadelphia                                  | 30                                                          |

Characterization of the selective recording of workplace exposure measurements into OSHA's IMIS databank. Philippe Sarazin, Igor Burstyn, Laurel Kincl, Melissa C. Friesen, Jérôme Lavoué

|               |    |
|---------------|----|
| Atlanta       | 35 |
| Chicago       | 39 |
| Dallas        | 44 |
| Kansas City   | 43 |
| Denver        | 55 |
| San Francisco | 31 |
| Seattle       | 48 |

---

<sup>a</sup><https://www.osha.gov/html/RAmap.html>.

Table S3: Risk ratios (RR) for the probability of a CEHD sampling result being recorded into IMIS for the full dataset approach

| Variable/<br>category                                 | RR (95% CI)<br>(full dataset) |                  |
|-------------------------------------------------------|-------------------------------|------------------|
|                                                       | 1987 <sup>a</sup>             | 2006             |
| <b>(Panel) X (Exposure level)</b>                     |                               |                  |
| Panel_no : Not detected                               | 1.00 (reference) <sup>b</sup> | 1.07 (1.04;1.10) |
| Panel_no : Detected <PEL                              | 1.52 (1.48;1.56) <sup>c</sup> | 2.57 (2.49;2.66) |
| Panel_no : Detected ≥PEL                              | 1.38 (1.34;1.42)              | 1.91 (1.83;1.99) |
| Panel_yes : Not detected                              | 0.96 (0.93;0.98)              | 0.67 (0.65;0.69) |
| Panel_yes : Detected <PEL                             | 1.64 (1.60;1.69)              | 1.82 (1.77;1.88) |
| Panel_yes : Detected ≥PEL                             | 1.64 (1.58;1.70)              | 1.49 (1.43;1.55) |
| <b>Sampling time</b>                                  |                               |                  |
| 480 minutes vs. 30 minutes                            | 1.10 (1.09;1.11) <sup>d</sup> |                  |
| <b>PEL citations in inspection</b>                    |                               |                  |
| None (0)                                              | 1.00 (reference)              |                  |
| Low (1-4)                                             | 0.97 (0.96;0.98)              |                  |
| High (5+)                                             | 0.93 (0.92;0.94)              |                  |
| <b>RespProt &amp; HazComm citations in inspection</b> |                               |                  |
| None (0)                                              | 1.00 (reference)              |                  |
| Low (1-3)                                             | 1.03 (1.02;1.04)              |                  |
| High (4+)                                             | 1.04 (1.03;1.05)              |                  |
| <b>Other citations in inspection</b>                  |                               |                  |
| None (0)                                              | 1.00 (reference)              |                  |
| Low (1-5)                                             | 1.05 (1.04;1.06)              |                  |
| High (6+)                                             | 1.02 (1.01;1.03)              |                  |
| <b>Other detected levels in inspection</b>            |                               |                  |
| None (0%)                                             | 1.00 (reference)              |                  |
| Low (1-33%)                                           | 1.00 (0.98;1.02)              |                  |
| Med (34-66%)                                          | 0.99 (0.97;1.01)              |                  |
| High (67%+)                                           | 1.02 (1.00;1.04)              |                  |
| <b>Establishment size</b>                             |                               |                  |
| Small (1-35)                                          | 1.00 (reference)              |                  |
| Medium (36-150)                                       | 1.01 (1.00;1.02)              |                  |
| Large (151+)                                          | 0.96 (0.95;0.97)              |                  |
| <b>Penalty</b>                                        |                               |                  |
| None                                                  | 1.00 (reference)              |                  |
| Low                                                   | 0.99 (0.97;1.00)              |                  |
| Medium                                                | 0.97 (0.95;0.98)              |                  |
| High                                                  | 0.91 (0.90;0.93)              |                  |
| <b>OSHA region<sup>e</sup></b>                        |                               |                  |
| Mean of OSHA regions                                  | 1.00 (reference)              |                  |
| Boston                                                | 1.05 (1.04;1.06)              |                  |
| New York                                              | 0.74 (0.74;0.75)              |                  |
| Philadelphia                                          | 0.76 (0.75;0.77)              |                  |

Characterization of the selective recording of workplace exposure measurements into OSHA's IMIS databank. Philippe Sarazin, Igor Burstyn, Laurel Kincl, Melissa C. Friesen, Jérôme Lavoué

|               |                  |
|---------------|------------------|
| Atlanta       | 0.92 (0.91;0.93) |
| Chicago       | 1.02 (1.01;1.03) |
| Dallas        | 1.12 (1.11;1.13) |
| Kansas City   | 1.12 (1.11;1.14) |
| Denver        | 1.40 (1.38;1.41) |
| San Francisco | 0.84 (0.82;0.86) |
| Seattle       | 1.22 (1.18;1.26) |

---

<sup>a</sup>To provide the results of the interaction terms involving year, we calculated predicted RRs for year 1987 (early year) and 2006 (recent year) for different combinations of the other variables.

<sup>b</sup>RR of the reference level taken as 1.

<sup>c</sup>95% confidence interval.

<sup>d</sup>RR for sampling time 480 min compared to 30 min.

<sup>e</sup><https://www.osha.gov/html/RAmap.html>.



Table S4: Risk ratios (RR) for the probability of a CEHD sampling result being recorded into IMIS for all chemical agents

| <b>Chemical agent</b>   | <b>RR<sup>b</sup> (95% CI)</b> |
|-------------------------|--------------------------------|
| Mean of chemical agents | 1.00 (reference) <sup>a</sup>  |
| Toluene                 | 1.27 (1.24;1.30)               |
| Xylene                  | 1.28 (1.25;1.31)               |
| 2-Butanone              | 1.20 (1.16;1.24)               |
| Stoddard Solvent        | 1.38 (1.33;1.43)               |
| Acetone                 | 1.26 (1.22;1.31)               |
| Lead, inorganic         | 2.00 (1.98;2.02)               |
| Copper fume             | 1.16 (1.14;1.17)               |
| Zinc oxide fume         | 1.13 (1.11;1.14)               |
| Antimony                | 1.11 (1.09;1.13)               |
| Chromium                | 1.14 (1.12;1.16)               |
| Beryllium               | 1.12 (1.10;1.14)               |
| Nickel                  | 1.15 (1.13;1.16)               |
| Iron oxide fume         | 1.18 (1.17;1.20)               |
| Cobalt                  | 1.14 (1.12;1.16)               |
| Manganese fume          | 1.11 (1.09;1.12)               |
| Cadmium fume            | 1.16 (1.14;1.19)               |
| Cadmium dust            | 0.19 (0.18;0.21)               |
| Arsenic                 | 0.81 (0.77;0.85)               |
| Chromic acid            | 1.28 (1.24;1.34)               |
| PNOR (respirable dust)  | 0.16 (0.15;0.17)               |
| Silica, quartz          | 1.21 (1.19;1.24)               |
| PNOR (total dust)       | 0.53 (0.52;0.55)               |
| Styrene                 | 1.17 (1.13;1.20)               |
| 4,4'-MDI                | 1.65 (1.60;1.71)               |

<sup>a</sup>Mean absolute probability of a CEHD sampling result being recorded into IMIS = 36%.

<sup>b</sup>RR adjusted for variables level of exposure, panel status, sampling duration, type of citations in inspection, other detected level in inspection, establishment size, penalty, and region.

Figure S1: Forest plots for each level of each predictor variable included in the empirical statistical models

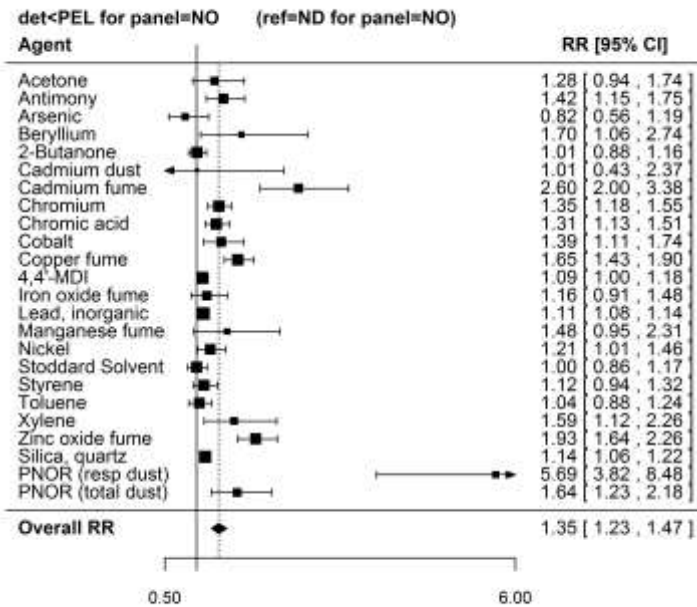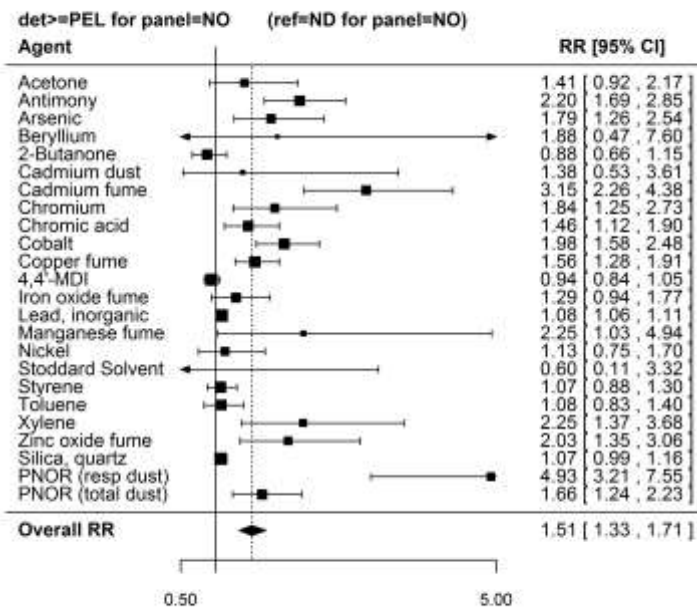

Characterization of the selective recording of workplace exposure measurements into OSHA's IMIS databank. Philippe Sarazin, Igor Burstyn, Laurel Kincl, Melissa C. Friesen, Jérôme Lavoué

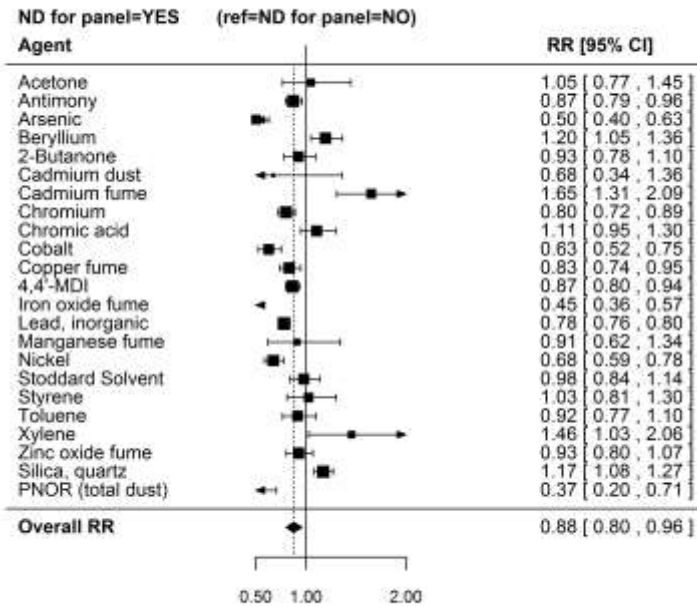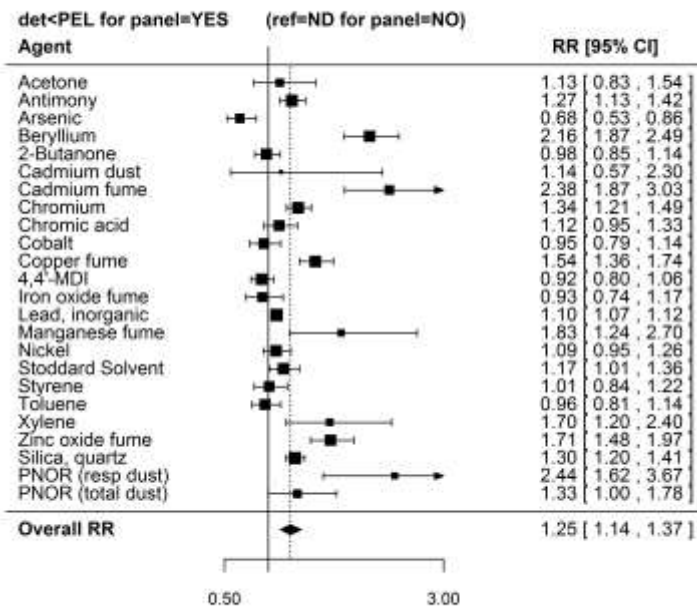

Characterization of the selective recording of workplace exposure measurements into OSHA's IMIS databank. Philippe Sarazin, Igor Burstyn, Laurel Kincl, Melissa C. Friesen, Jérôme Lavoué

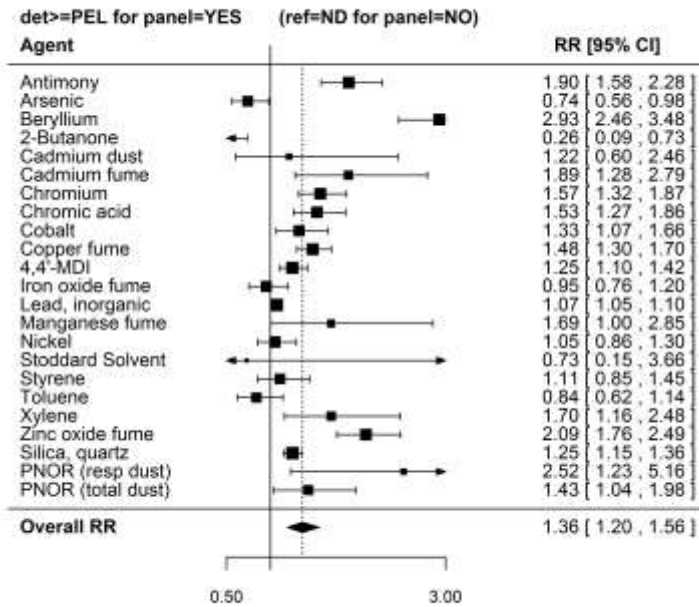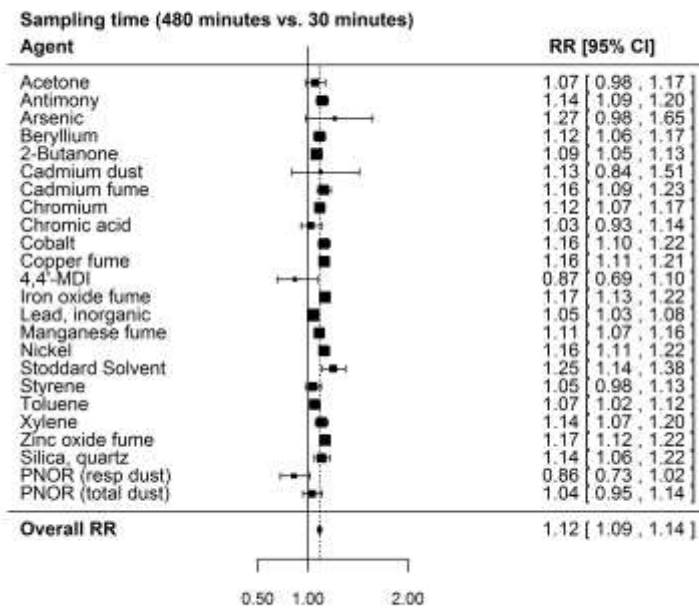

Characterization of the selective recording of workplace exposure measurements into OSHA's IMIS databank. Philippe Sarazin, Igor Burstyn, Laurel Kincl, Melissa C. Friesen, Jérôme Lavoué

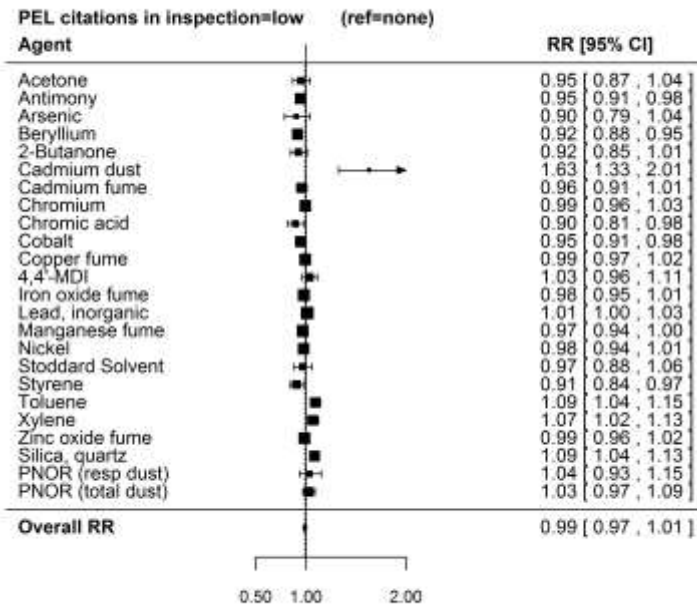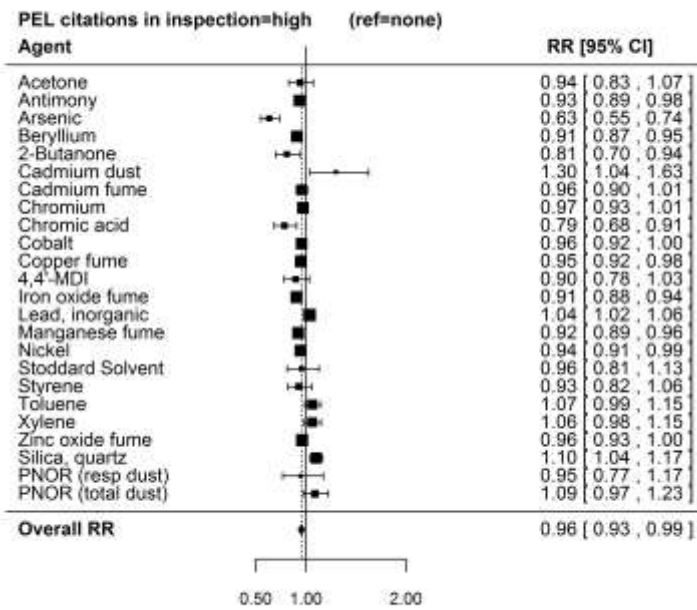

Characterization of the selective recording of workplace exposure measurements into OSHA's IMIS databank. Philippe Sarazin, Igor Burstyn, Laurel Kincl, Melissa C. Friesen, Jérôme Lavoué

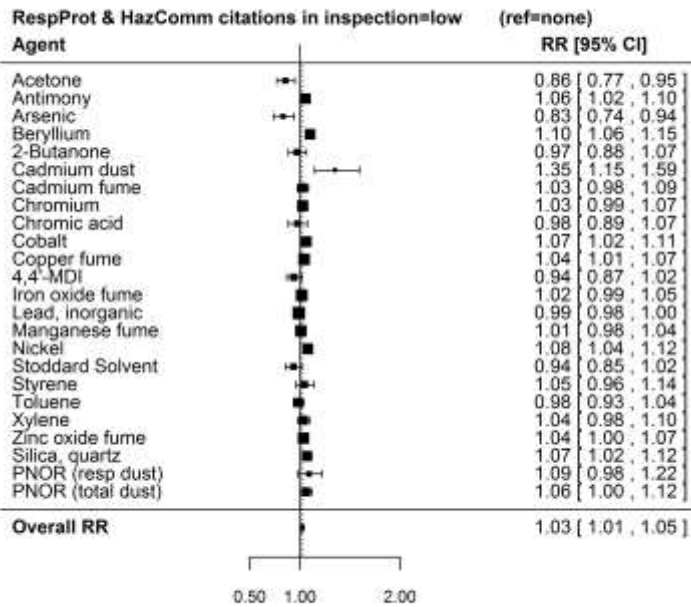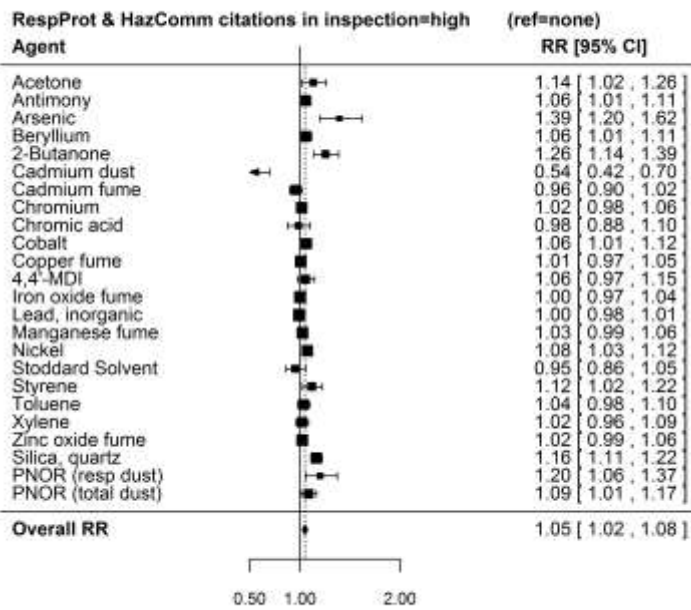

Characterization of the selective recording of workplace exposure measurements into OSHA's IMIS databank. Philippe Sarazin, Igor Burstyn, Laurel Kincl, Melissa C. Friesen, Jérôme Lavoué

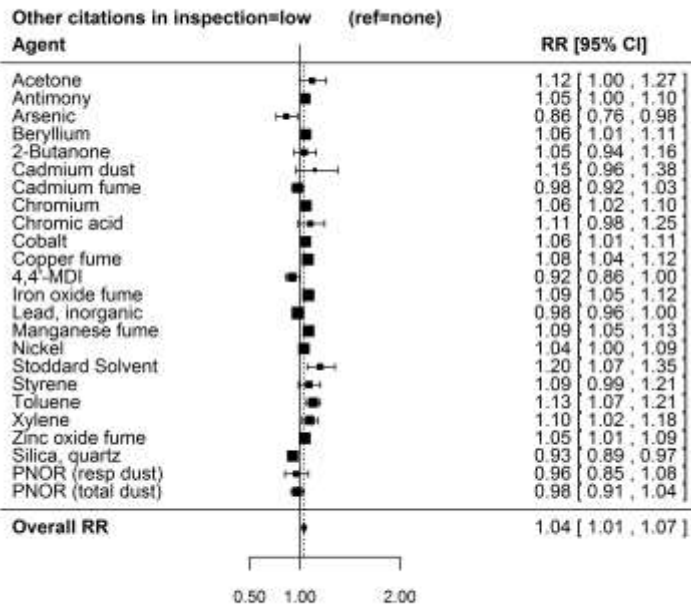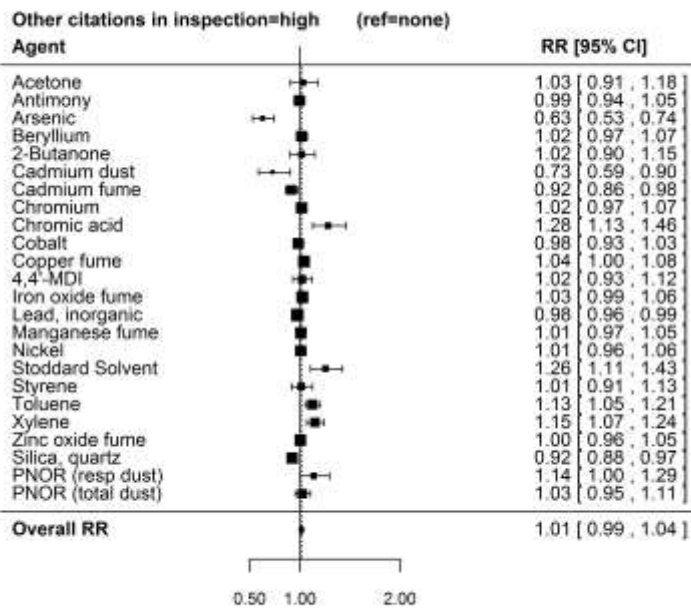

Characterization of the selective recording of workplace exposure measurements into OSHA's IMIS databank. Philippe Sarazin, Igor Burstyn, Laurel Kincl, Melissa C. Friesen, Jérôme Lavoué

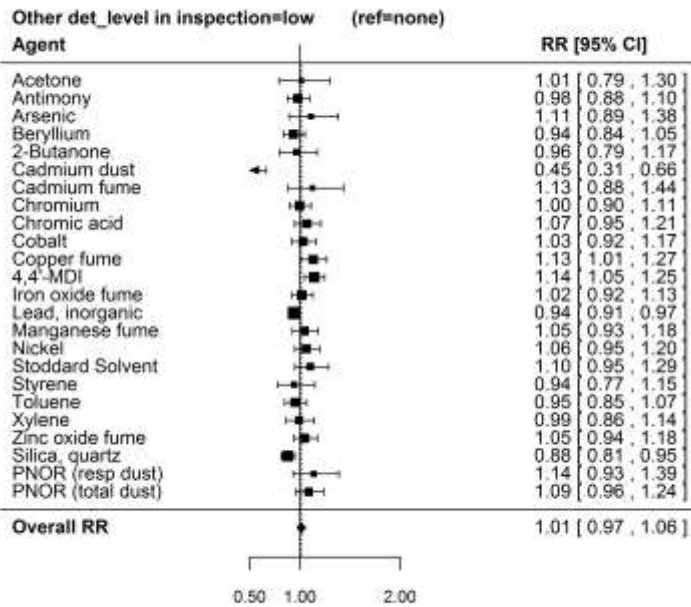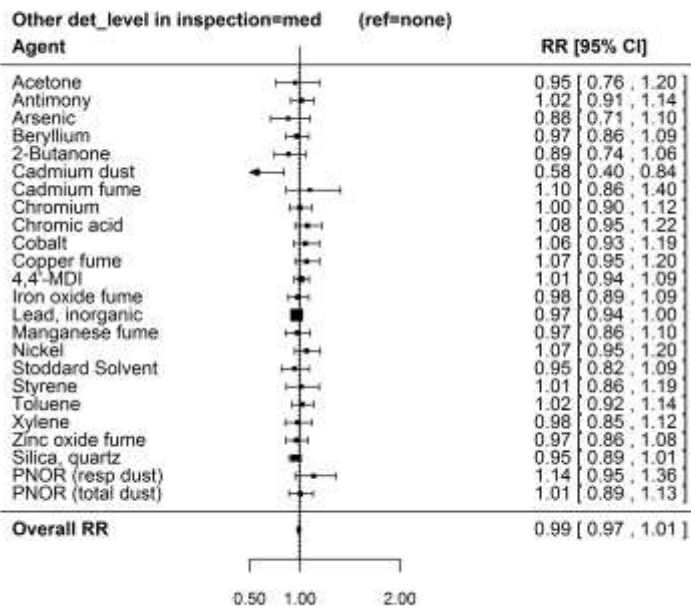



Characterization of the selective recording of workplace exposure measurements into OSHA's IMIS databank. Philippe Sarazin, Igor Burstyn, Laurel Kincl, Melissa C. Friesen, Jérôme Lavoué

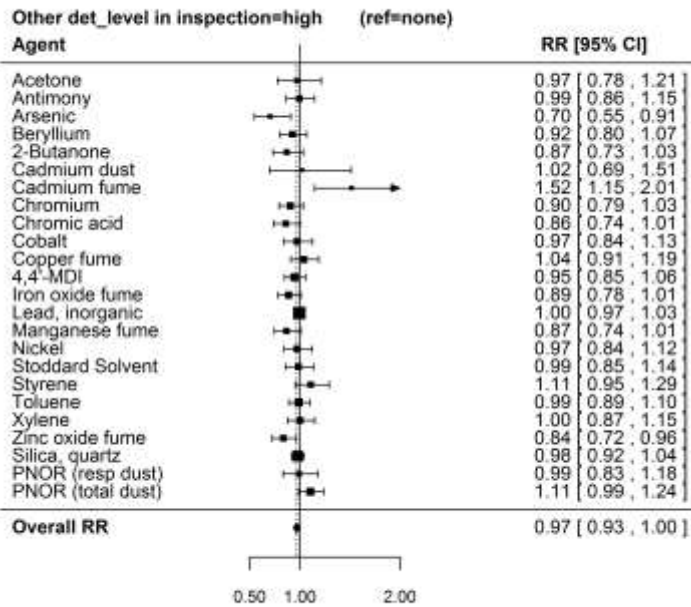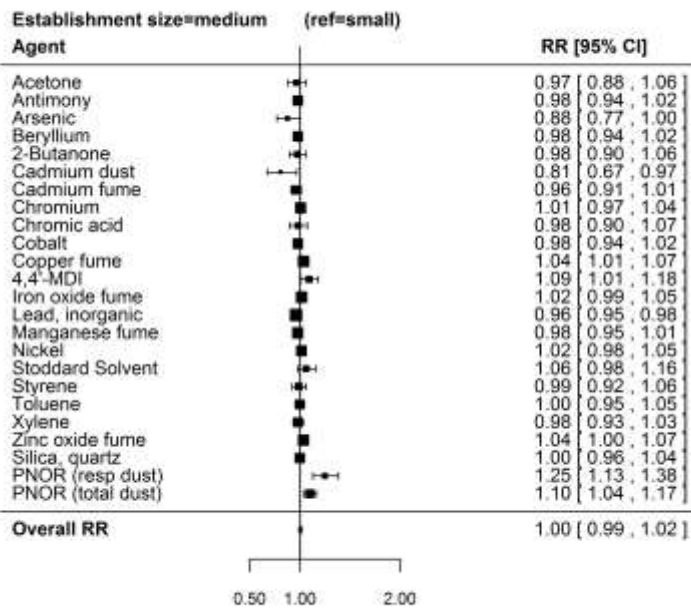

Characterization of the selective recording of workplace exposure measurements into OSHA's IMIS databank. Philippe Sarazin, Igor Burstyn, Laurel Kincl, Melissa C. Friesen, Jérôme Lavoué

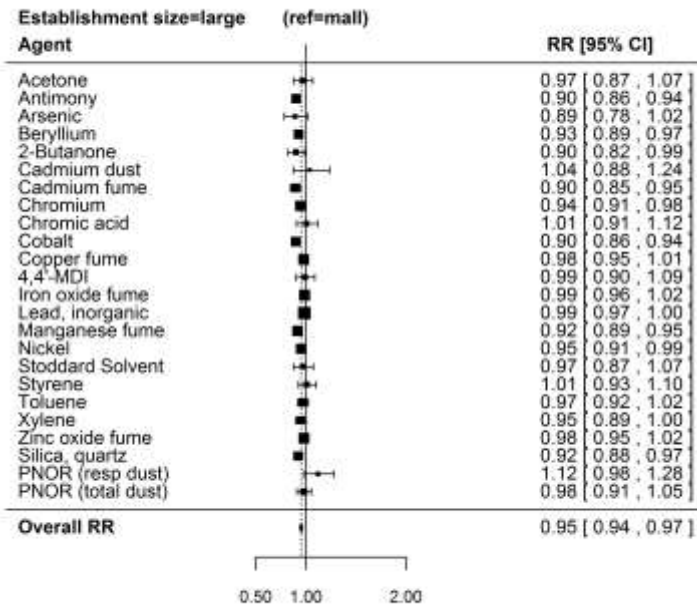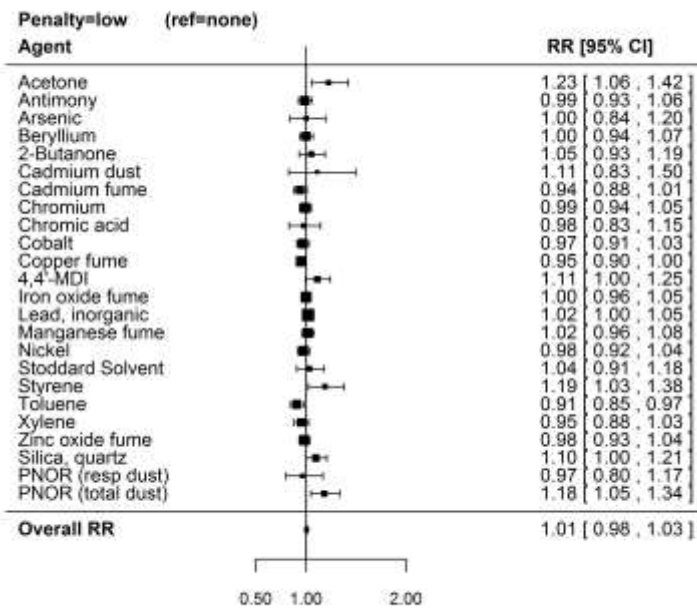

Characterization of the selective recording of workplace exposure measurements into OSHA's IMIS databank. Philippe Sarazin, Igor Burstyn, Laurel Kincl, Melissa C. Friesen, Jérôme Lavoué

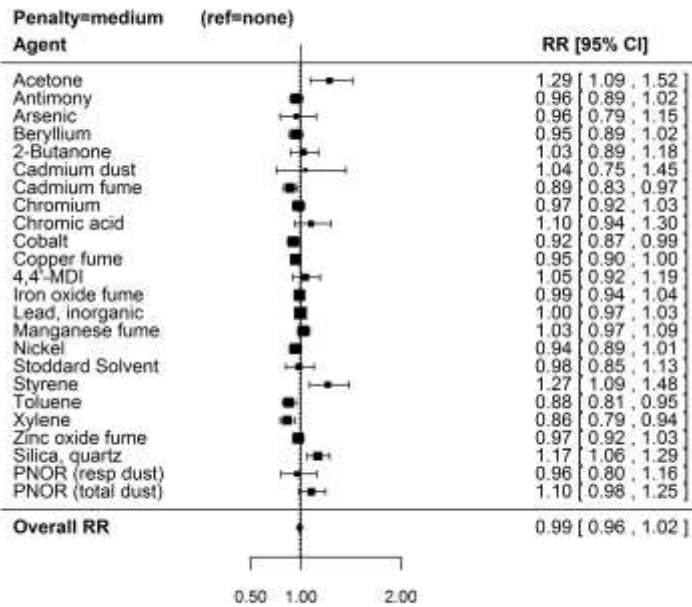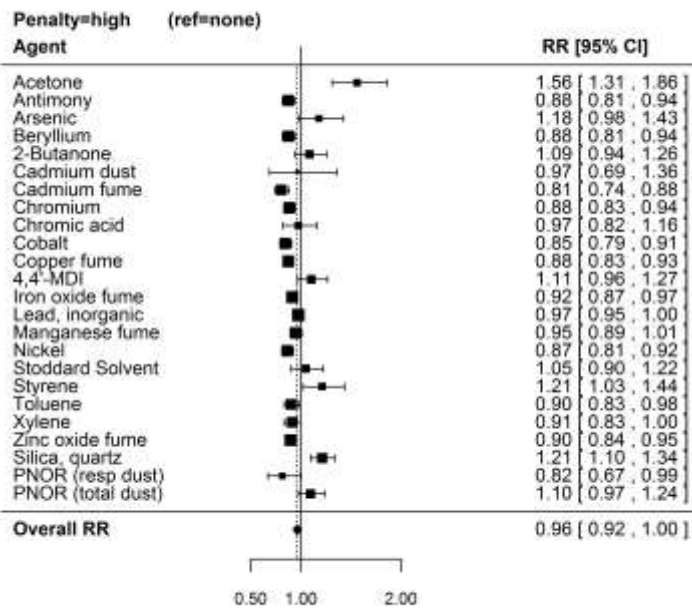

Characterization of the selective recording of workplace exposure measurements into OSHA's IMIS databank. Philippe Sarazin, Igor Burstyn, Laurel Kincl, Melissa C. Friesen, Jérôme Lavoué

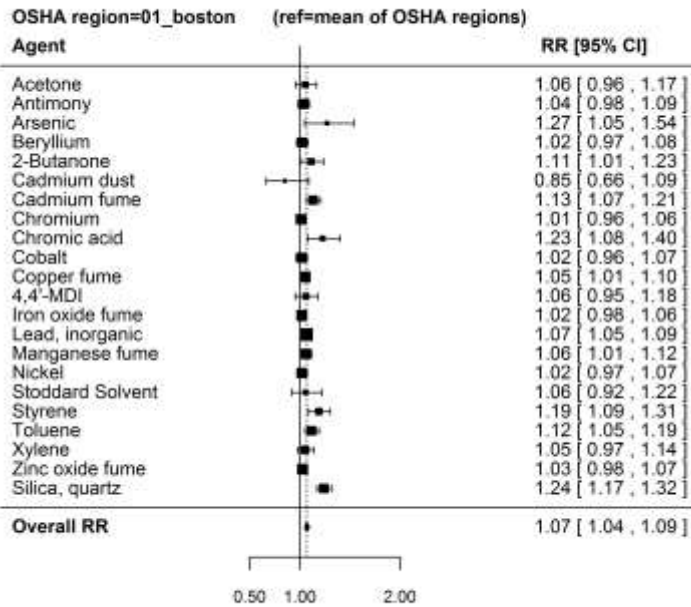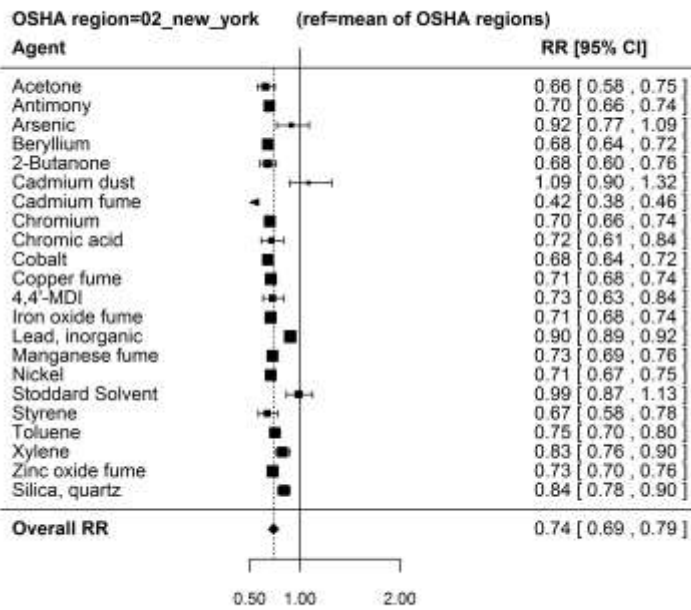

Characterization of the selective recording of workplace exposure measurements into OSHA's IMIS databank. Philippe Sarazin, Igor Burstyn, Laurel Kincl, Melissa C. Friesen, Jérôme Lavoué

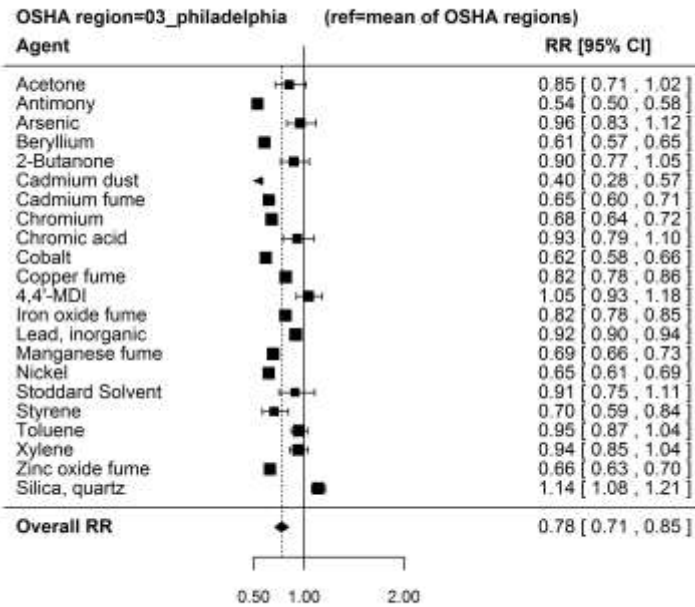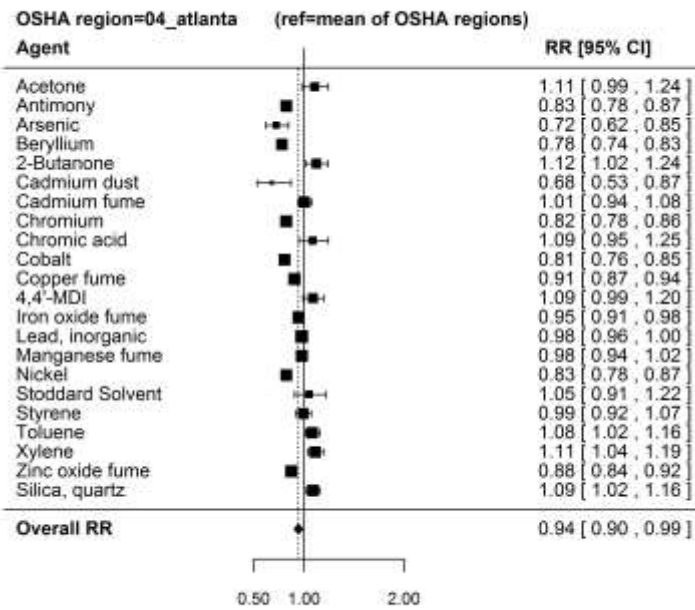

Characterization of the selective recording of workplace exposure measurements into OSHA's IMIS databank. Philippe Sarazin, Igor Burstyn, Laurel Kincl, Melissa C. Friesen, Jérôme Lavoué

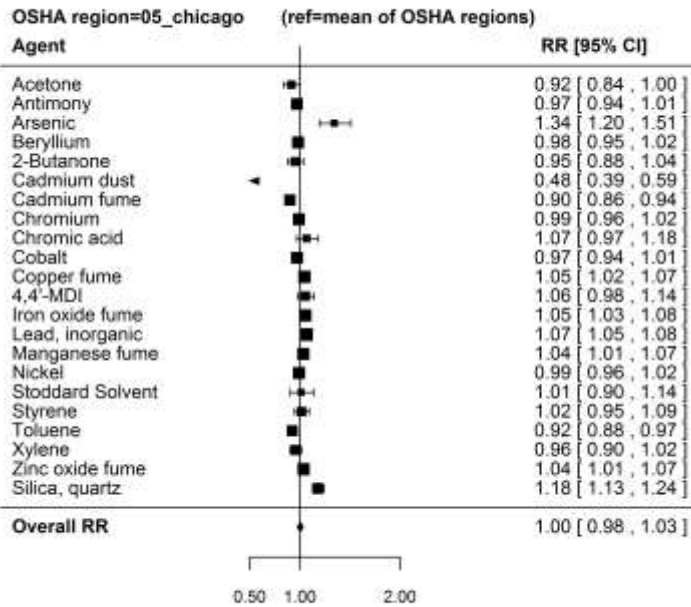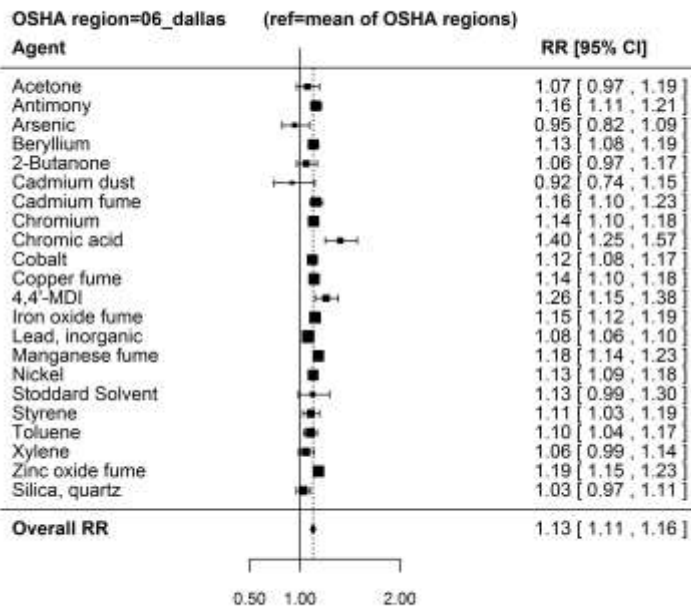

Characterization of the selective recording of workplace exposure measurements into OSHA's IMIS databank. Philippe Sarazin, Igor Burstyn, Laurel Kincl, Melissa C. Friesen, Jérôme Lavoué

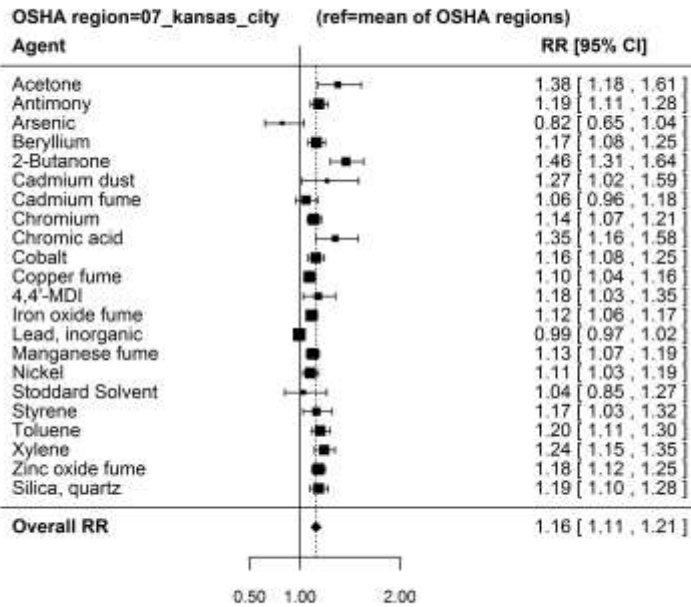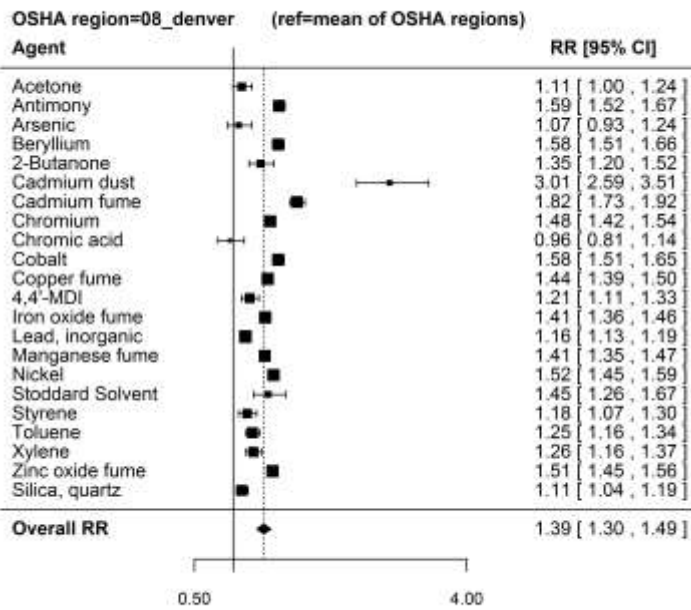

Characterization of the selective recording of workplace exposure measurements into OSHA's IMIS databank. Philippe Sarazin, Igor Burstyn, Laurel Kincl, Melissa C. Friesen, Jérôme Lavoué

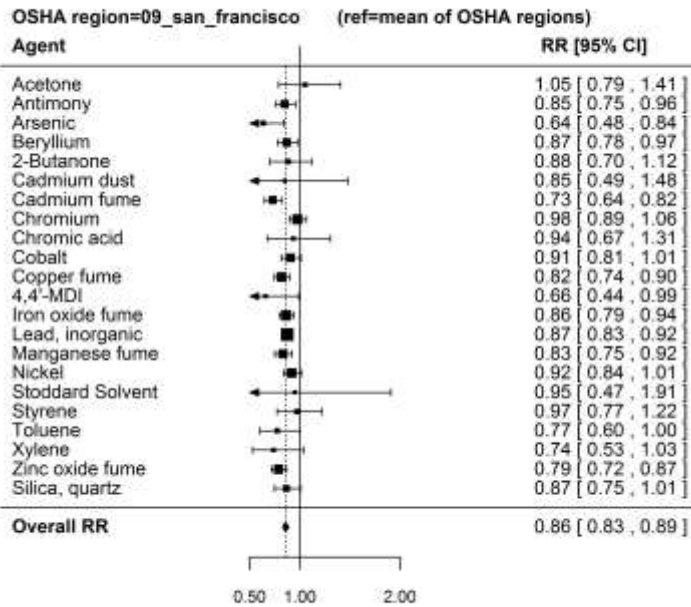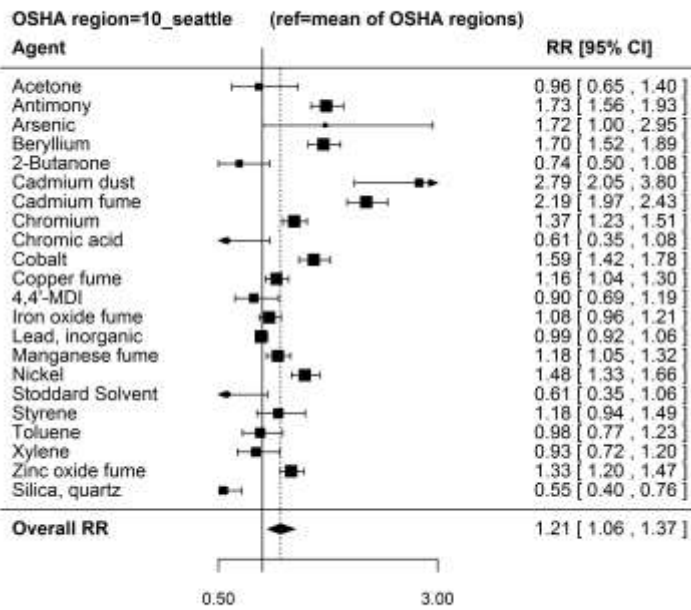



Characterization of the selective recording of workplace exposure measurements into OSHA's IMIS databank. Philippe Sarazin, Igor Burstyn, Laurel Kincl, Melissa C. Friesen, Jérôme Lavoué

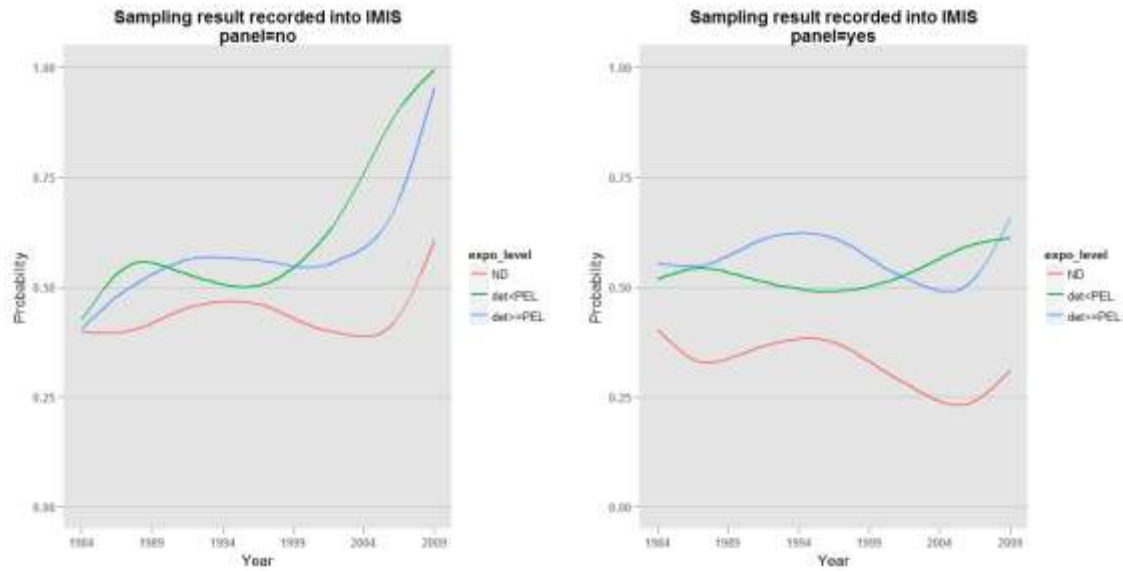

Figure S2: Probability of a CEHD sampling result being recorded into IMIS by year, stratified by panel status and level of exposure. Predicted probabilities were estimated for each year, based on median sampling duration (342 minutes) and on the reference level of each categorical variable (for OSHA region and chemical agent variables, categories closest to the population average were chosen, i.e. Chicago and 2-butanone, respectively).
